# Supplementary material for: The unusual mode of action of the polyketide glycoside antibiotic cervimycin C
Source: PubMed Central journal article supplement (PMC11237698; doi:10.1128/msphere.00764-23), 2024-05-09
Supplement: msphere.00764-23-s0001.pdf [file msphere.00764-23-s0001.pdf]

## Supplementary Data

---

### Figures

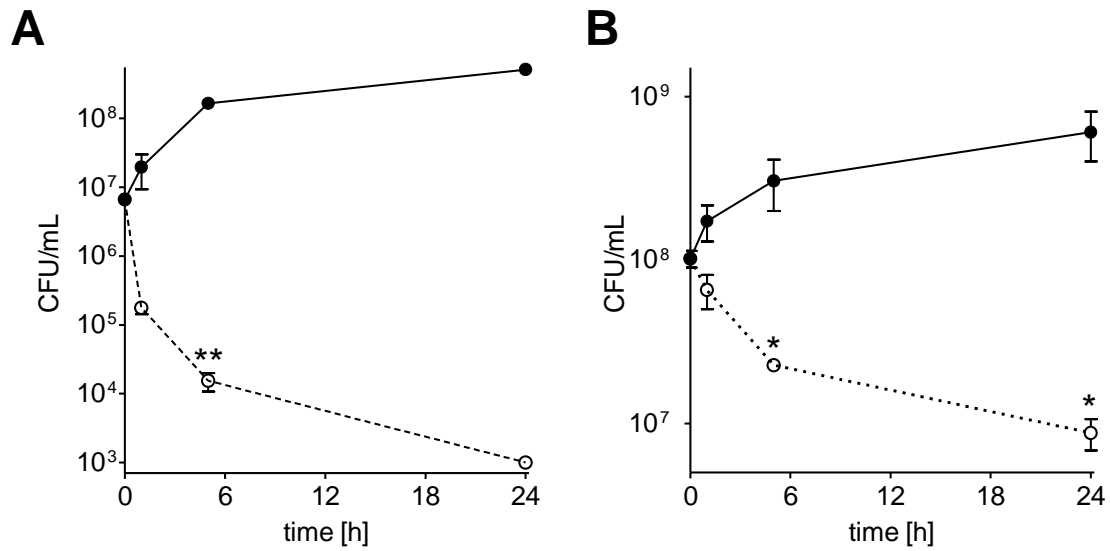

**Figure S1:** Cervimycin C (CmC) kills Gram-positive bacteria. Exponentially growing *Bacillus subtilis* 168 (A) or *S. aureus* SG511 Berlin (B) were treated with  $6 \times \text{MIC}$  CmC, respectively, or the same volume of DMSO (untreated), and dilutions of the cultures were plated on TSA after the indicated periods of time; \*\*,  $p \leq 0.0055$ ; CFU, colony forming units.

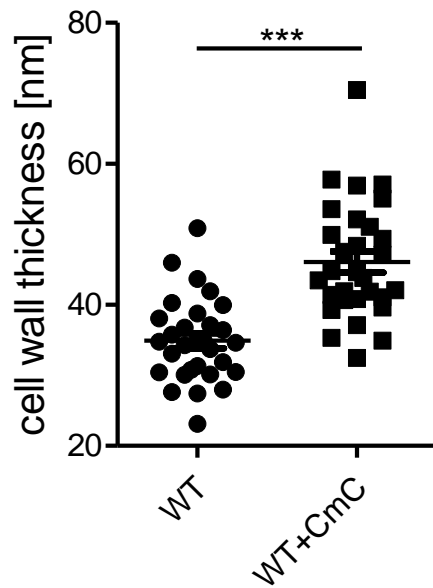

**Figure S2: Cervimycin treatment of *S. aureus* SG511 Berlin (WT) leads to a significant increase in cell wall thickness.** *S. aureus* was grown in BHI medium and after reaching the exponential growth phase treated with 3 × MIC CmC (6 µg/mL) for 1 h (WT+CmC) or left untreated (WT). Cells were fixed and visualized via scanning transmission electron microscopy. Analysis of the cell wall thickness using the ImageJ software (1) and 100 cells per sample revealed a significant increase in cell wall thickness after cervimycin treatment; \*\*\*,  $p < 0.0001$ .

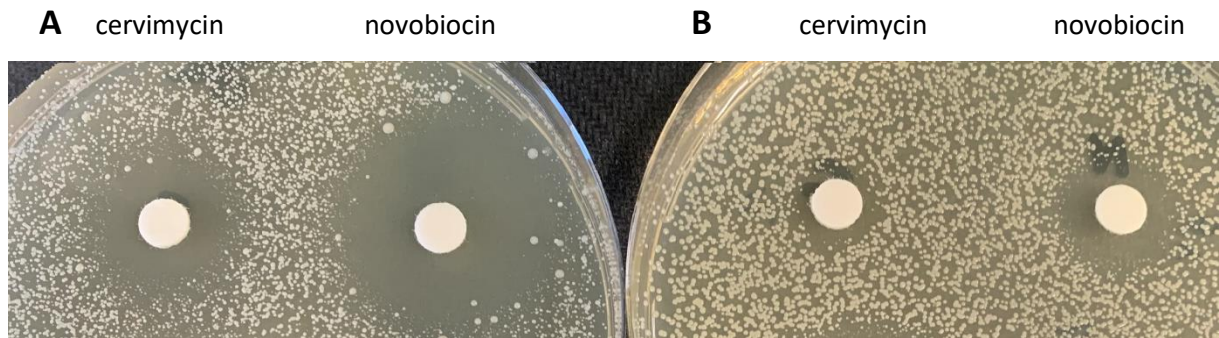

**Figure S3: Suppression of growth of the *gyrB* antisense clone in the presence of cervimycin and novobiocin (positive control).** Blank discs were loaded with cervimycin (25  $\mu$ g, left side) and novobiocin (175 ng, right side) and cells were incubated on LB agar (34 mg/L chloramphenicol and 17 mM xylose in A) and 34 mg/l chloramphenicol in B) at 37  $^{\circ}$ C. In the presence of xylose (A) growth is much slower, and the inhibition zones are enlarged (1.45-fold for cervimycin and 1.8-fold for novobiocin). Larger colonies within the inhibition zones appeared regularly and plasmid sequencing showed that these colonies had mutations in the promoter that drives transcription of the antisense RNA.

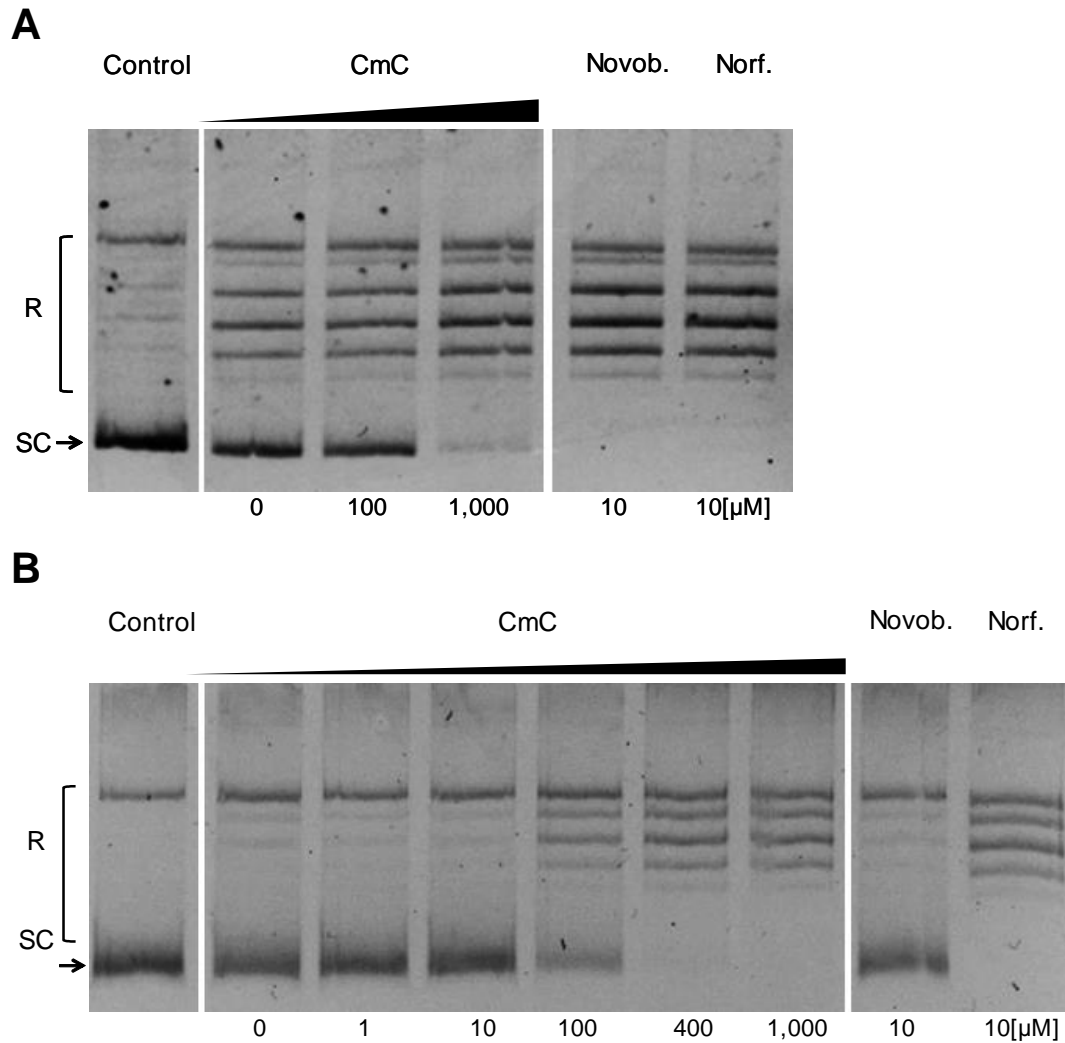

**Figure S4: DNA gyrase supercoiling activity.** *E. coli* (A) and *S. aureus* (B) DNA gyrase activity was measured as proportion of supercoiled DNA after incubation of 2 U DNA gyrase with 0.125 mg relaxed plasmid DNA and cervimycin (CmC) for 1 h at 37 °C in comparison to a control (control) treated with the same amount of DMSO. DNA gyrase targeting antibiotics novobiocin (Novob.) and norfloxacin (Norf.) served as positive controls for DNA gyrase inhibition.

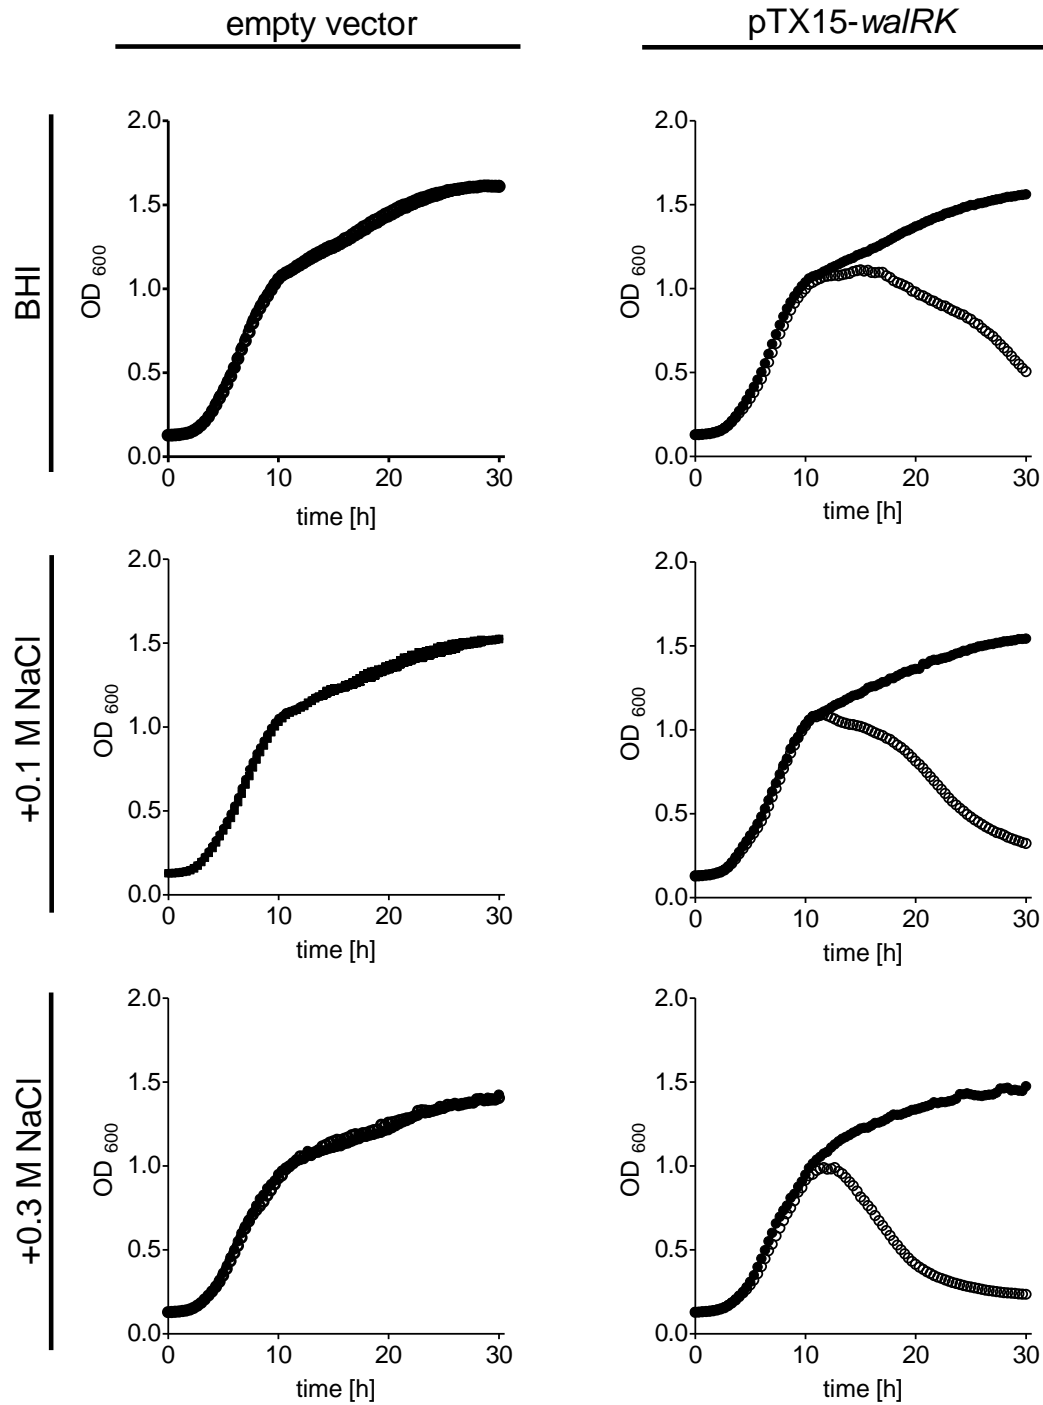

**Figure S5: Growth curves of *S. aureus* HG003 pTX15 (empty vector) and *S. aureus* HG003 pTX15-*walRK* in BHI medium with increasing concentrations of sodium chloride.** *S. aureus* strains were grown in BHI broth at 25 °C. Overexpression of WalRK was induced by the addition of 50 mM xylose (open circles), or measured without the addition of xylose (closed symbols). Increasing sodium chloride concentrations caused cell lysis of the WalRK overexpression strain at 25 °C, but not of the empty vector control.

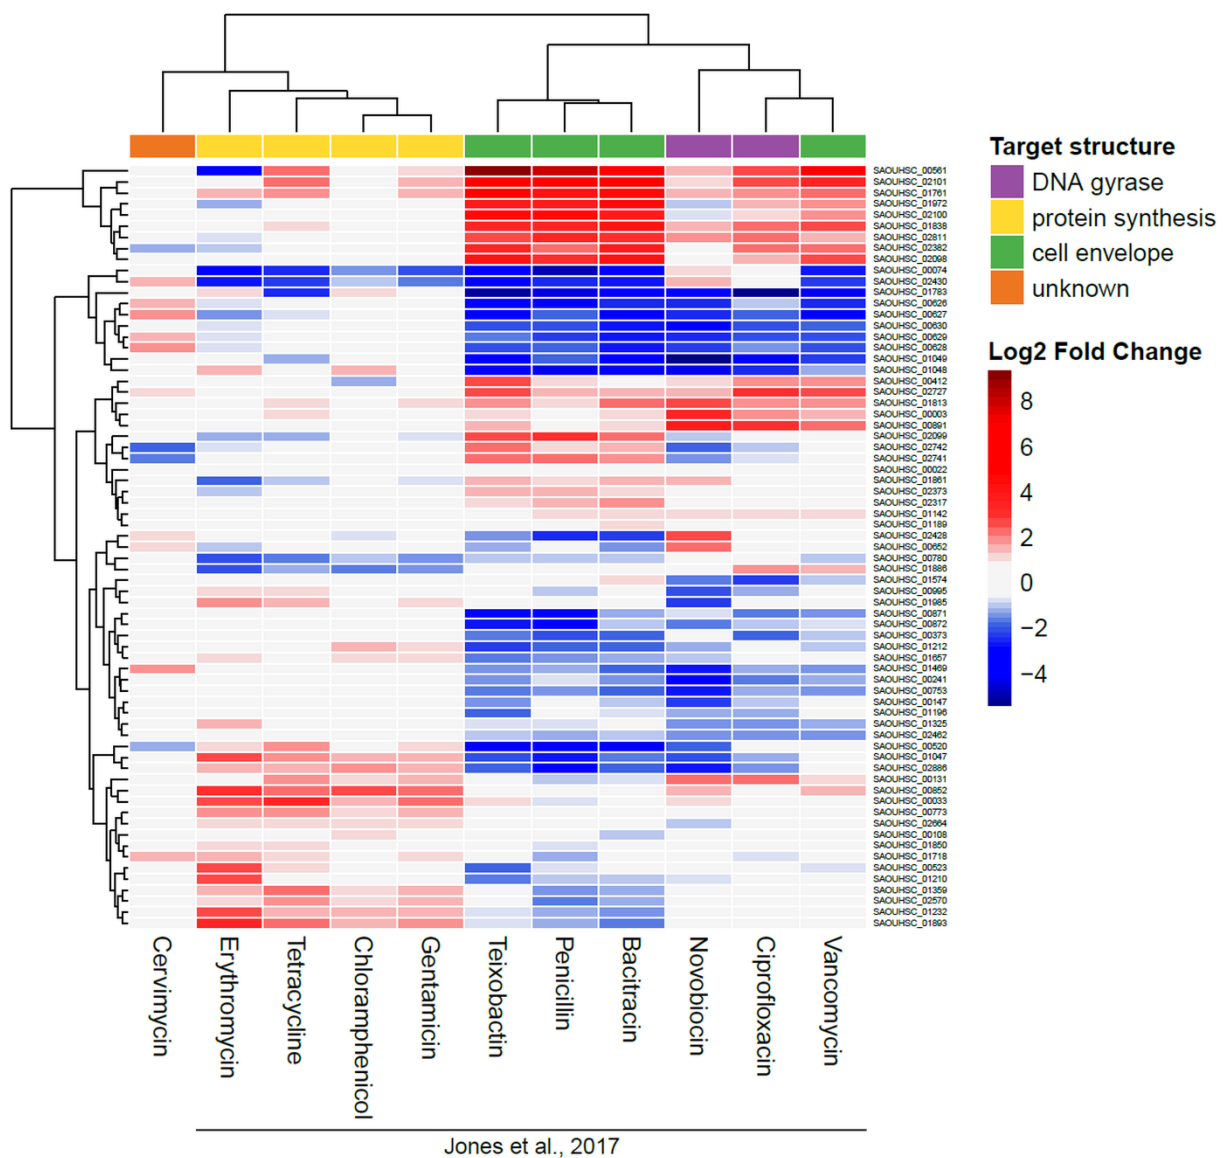

**Figure S6: Heatmap of expression levels of 69 *S. aureus* genes predictive of antibiotic mode of action.** The heatmap was generated from the data of Jones et al. (2017) (2) and the cervimycin C RNA-Seq experiment (this study) using the ggplot2 R package (3). Differential expression is displayed as Log<sub>2</sub> ratios generated from RPKM values for antibiotic and 2% DMSO-treated *S. aureus* cells. Only significant expression levels were included ( $p$ -value  $\leq 0.05$ ). Red shading indicates higher expression of *S. aureus* genes compared to the 2% DMSO treatment, blue shading indicates lower expression, grey shading indicates a non-significant expression level/a non-significant alteration ( $p$ -value  $> 0.05$ ).

## Tables

**Table S1: Ciprofloxacin- and novobiocin-resistance mediating gyrase mutations have no effect on cervimycin susceptibility.** Antibiotic susceptibility was tested in agar diffusion assays; VA, vancomycin (30  $\mu$ g); CIP, ciprofloxacin (5  $\mu$ g); Novo, novobiocin (25  $\mu$ g); CmC, cervimycin C (25  $\mu$ g).

| Strain                                       | Diameter inhibition zone [mm] |          |           |     |
|----------------------------------------------|-------------------------------|----------|-----------|-----|
|                                              | VA                            | CIP      | Novo      | CmC |
| <i>S. aureus</i> RN4220                      | 16                            | 22       | 23        | 11  |
| <i>S. aureus</i> RN4220 GyrA <sup>S84L</sup> | 16                            | <b>9</b> | 23        | 11  |
| <i>S. aureus</i> RN4220 GyrB <sup>G86S</sup> | 16                            | 22       | <b>17</b> | 11  |

**Table S2: Differential expression/translation of genes/proteins in *S. aureus* SG511 Berlin treated with 3  $\times$  MIC cervimycin C in comparison to untreated *S. aureus* SG511 Berlin.** Shown is the total number of genes/proteins with a significant detection level (total,  $p$ -value  $\leq 0.05$ ), as well as the number of significantly up-regulated (up, Log<sub>2</sub> Fold Change  $\geq 1$ ) and down-regulated (down, Log<sub>2</sub> Fold Change  $\leq -1$ ) genes/proteins.

| Omics                             | total | diff. expressed | up              | down            |
|-----------------------------------|-------|-----------------|-----------------|-----------------|
| <b>transcriptome</b>              | 1210  | 564<br>(46.61%) | 298<br>(24.63%) | 266<br>(21.98%) |
| <b>proteome</b>                   | 336   | 67<br>(19.94%)  | 32<br>(9.52%)   | 35<br>(10.42%)  |
| <b>transcriptome and proteome</b> | 1279  | 25<br>(1.96%)   | 15<br>(1.17%)   | 10<br>(0.78%)   |

**Table S3: Transcriptomic and proteomic data of cervimycin treated *S. aureus* SG511 Berlin.**

Genes/proteins with at least 2-fold differential expression in comparison to the untreated *S. aureus* SG511 and significant p-value ( $p \leq 0.05$ ) are shown, which corresponds to a  $\log_2$  Fold Change  $\geq 1$  or  $\leq -1$ . The specified regulators correspond to the genome of *S. aureus* NCTC 8325 and were derived from the Aureowiki database (4). Significantly differentially expressed genes/proteins are marked in blue (down-regulated) and red (up-regulated), respectively. 0 indicates a non-significant expression/detection level.

| Locus tag<br>KQU62_ | Gene Name | Regulator 1 | Reg. 2 | Reg. 3 | Reg. 4 | Log <sub>2</sub> Fold Change |          |
|---------------------|-----------|-------------|--------|--------|--------|------------------------------|----------|
|                     |           |             |        |        |        | transcriptome                | proteome |
| _00020              | -         | 0           | 0      | 0      | 0      | -1.587                       | 0        |
| _00050              | -         | 0           | 0      | 0      | 0      | -1.36                        | 0        |
| _00065              | -         | 0           | 0      | 0      | 0      | -1.461                       | 0        |
| _00270              | -         | 0           | 0      | 0      | 0      | 1.641                        | 0        |
| _00390              | -         | 0           | 0      | 0      | 0      | 1.348                        | 0        |
| _00400              | -         | 0           | 0      | 0      | 0      | 1.613                        | 0        |
| _00475              | -         | 0           | 0      | 0      | 0      | -1.225                       | 0        |
| _00480              | -         | 0           | 0      | 0      | 0      | -1.161                       | 0        |
| _00485              | -         | 0           | 0      | 0      | 0      | -1.296                       | 0        |
| _00520              | -         | 0           | 0      | 0      | 0      | 1.491                        | 0        |
| _00635              | -         | 0           | 0      | 0      | 0      | 1.287                        | 0        |
| _00750              | -         | 0           | 0      | 0      | 0      | -1.068                       | 0        |
| _00870              | -         | 0           | 0      | 0      | 0      | 0                            | 1.38     |
| _00885              | -         | 0           | 0      | 0      | 0      | 1.214                        | 0        |
| _00935              | -         | 0           | 0      | 0      | 0      | -0.628                       | 2.26     |
| _00995              | -         | 0           | 0      | 0      | 0      | 0                            | -1.37    |
| _01445              | -         | 0           | 0      | 0      | 0      | 1.062                        | 0.294    |
| _01510              | -         | 0           | 0      | 0      | 0      | 1.501                        | 0        |
| _01615              | -         | 0           | 0      | 0      | 0      | 2.259                        | 0.38     |
| _01620              | -         | 0           | 0      | 0      | 0      | 2.699                        | 0        |
| _01630              | -         | 0           | 0      | 0      | 0      | -1.055                       | -2.27    |
| _01635              | -         | 0           | 0      | 0      | 0      | -1.296                       | 0        |
| _01725              | -         | 0           | 0      | 0      | 0      | -1.543                       | -0.806   |
| _01805              | -         | 0           | 0      | 0      | 0      | 1.099                        | 0        |
| _01810              | -         | 0           | 0      | 0      | 0      | 1.037                        | 0        |
| _02010              | -         | 0           | 0      | 0      | 0      | 0                            | -1.54    |
| _02030              | -         | 0           | 0      | 0      | 0      | 1.016                        | 0        |
| _02150              | -         | 0           | 0      | 0      | 0      | 2.122                        | 0        |
| _02215              | -         | 0           | 0      | 0      | 0      | 1.28                         | 0        |
| _02270              | -         | 0           | 0      | 0      | 0      | 1.068                        | 0        |
| _02525              | -         | 0           | 0      | 0      | 0      | 1.057                        | 0        |
| _02600              | -         | 0           | 0      | 0      | 0      | 1.793                        | 0        |



| Locus tag<br>KQU62_ | Gene Name | Regulator 1 | Reg. 2 | Reg. 3 | Reg. 4 | Log <sub>2</sub> Fold Change |          |
|---------------------|-----------|-------------|--------|--------|--------|------------------------------|----------|
|                     |           |             |        |        |        | transcriptome                | proteome |
| _02610              | -         | 0           | 0      | 0      | 0      | 3.066                        | 0        |
| _02620              | -         | 0           | 0      | 0      | 0      | 3.816                        | 0        |
| _02625              | -         | 0           | 0      | 0      | 0      | 2.619                        | 0        |
| _02630              | -         | 0           | 0      | 0      | 0      | 3.168                        | 0        |
| _02635              | -         | 0           | 0      | 0      | 0      | 2.466                        | 0        |
| _02640              | -         | 0           | 0      | 0      | 0      | 2.425                        | 0        |
| _02645              | -         | 0           | 0      | 0      | 0      | 2.329                        | 0        |
| _02650              | -         | 0           | 0      | 0      | 0      | 1.938                        | 0        |
| _02710              | -         | 0           | 0      | 0      | 0      | -2.037                       | 0        |
| _02805              | -         | 0           | 0      | 0      | 0      | -1.061                       | 0        |
| _02840              | -         | 0           | 0      | 0      | 0      | -1.02                        | 0        |
| _02925              | -         | 0           | 0      | 0      | 0      | 1.056                        | 0        |
| _03015              | -         | 0           | 0      | 0      | 0      | 1.086                        | 0        |
| _03165              | -         | 0           | 0      | 0      | 0      | 1.582                        | 0        |
| _03200              | -         | 0           | 0      | 0      | 0      | 2.537                        | 0        |
| _03495              | -         | 0           | 0      | 0      | 0      | 1.287                        | 0        |
| _03500              | -         | 0           | 0      | 0      | 0      | 1.089                        | 0        |
| _03510              | -         | 0           | 0      | 0      | 0      | 1.628                        | 0        |
| _03515              | -         | 0           | 0      | 0      | 0      | 2.192                        | 0        |
| _03520              | -         | 0           | 0      | 0      | 0      | 1.547                        | 0        |
| _03570              | -         | 0           | 0      | 0      | 0      | 1.993                        | 0.404    |
| _03775              | -         | 0           | 0      | 0      | 0      | 0                            | 1.37     |
| _03840              | -         | 0           | 0      | 0      | 0      | 1.18                         | 0        |
| _03900              | -         | 0           | 0      | 0      | 0      | 0.253                        | 1.92     |
| _03910              | -         | 0           | 0      | 0      | 0      | 1.515                        | 0        |
| _03985              | -         | 0           | 0      | 0      | 0      | 1.128                        | 0        |
| _04065              | -         | 0           | 0      | 0      | 0      | -1.069                       | 0        |
| _04460              | -         | 0           | 0      | 0      | 0      | -1.369                       | -0.324   |
| _04795              | -         | 0           | 0      | 0      | 0      | 1.16                         | 0        |
| _04850              | -         | 0           | 0      | 0      | 0      | 1.564                        | 0.249    |
| _04855              | -         | 0           | 0      | 0      | 0      | 1.368                        | 0        |
| _04950              | -         | 0           | 0      | 0      | 0      | 1.629                        | 0        |
| _05745              | -         | 0           | 0      | 0      | 0      | 1.688                        | 0        |
| _05885              | -         | 0           | 0      | 0      | 0      | 1.41                         | 0.405    |
| _06525              | -         | 0           | 0      | 0      | 0      | 1.395                        | 0        |
| _06570              | -         | 0           | 0      | 0      | 0      | 1.078                        | 0        |
| _06575              | -         | 0           | 0      | 0      | 0      | 1.319                        | 0        |
| _06580              | -         | 0           | 0      | 0      | 0      | 1.527                        | 0        |
| _06610              | -         | 0           | 0      | 0      | 0      | 1.691                        | 0        |
| _06625              | -         | 0           | 0      | 0      | 0      | 1.181                        | 0        |
| _06655              | -         | 0           | 0      | 0      | 0      | 1.178                        | 0        |
| _07055              | -         | 0           | 0      | 0      | 0      | 1.025                        | 0.24     |
| _07260              | -         | 0           | 0      | 0      | 0      | 0.622                        | 1.26     |
| _07380              | -         | 0           | 0      | 0      | 0      | 1.329                        | 0.254    |

| Locus tag<br>KQU62_ | Gene Name | Regulator 1 | Reg. 2 | Reg. 3 | Reg. 4 | Log <sub>2</sub> Fold Change |          |
|---------------------|-----------|-------------|--------|--------|--------|------------------------------|----------|
|                     |           |             |        |        |        | transcriptome                | proteome |
| _07485              | -         | 0           | 0      | 0      | 0      | -1.327                       | 0        |
| _07490              | -         | 0           | 0      | 0      | 0      | -1.254                       | 0        |
| _07725              | -         | 0           | 0      | 0      | 0      | 0.294                        | 1.03     |
| _07795              | -         | 0           | 0      | 0      | 0      | -1.067                       | -0.344   |
| _08110              | -         | 0           | 0      | 0      | 0      | -1.097                       | -0.391   |
| _08170              | -         | 0           | 0      | 0      | 0      | 1.603                        | 0        |
| _08200              | -         | 0           | 0      | 0      | 0      | 1.2                          | -0.873   |
| _08210              | -         | 0           | 0      | 0      | 0      | 1.577                        | 0        |
| _08770              | -         | 0           | 0      | 0      | 0      | -1.477                       | 0        |
| _08885              | -         | 0           | 0      | 0      | 0      | -0.545                       | -1.52    |
| _08960              | -         | 0           | 0      | 0      | 0      | 1.888                        | 0        |
| _09415              | -         | 0           | 0      | 0      | 0      | -1.079                       | 0        |
| _09425              | -         | 0           | 0      | 0      | 0      | 1.32                         | 0        |
| _09580              | -         | 0           | 0      | 0      | 0      | -1.155                       | 0        |
| _09655              | -         | 0           | 0      | 0      | 0      | 1.065                        | 0        |
| _09965              | -         | 0           | 0      | 0      | 0      | 1.297                        | 0        |
| _09995              | -         | 0           | 0      | 0      | 0      | 1.346                        | 0        |
| _10050              | -         | 0           | 0      | 0      | 0      | 1.715                        | 0        |
| _10225              | -         | 0           | 0      | 0      | 0      | -1.447                       | 0        |
| _10325              | -         | 0           | 0      | 0      | 0      | 0                            | 1.19     |
| _10415              | -         | 0           | 0      | 0      | 0      | -1.59                        | 0        |
| _10420              | -         | 0           | 0      | 0      | 0      | -1.319                       | -0.431   |
| _10430              | -         | 0           | 0      | 0      | 0      | -1.893                       | -0.503   |
| _10480              | -         | 0           | 0      | 0      | 0      | 1.253                        | 0.58     |
| _10550              | -         | 0           | 0      | 0      | 0      | 1.086                        | 0        |
| _10555              | -         | 0           | 0      | 0      | 0      | -2.583                       | 0        |
| _10560              | -         | 0           | 0      | 0      | 0      | -1.696                       | 0        |
| _10575              | -         | 0           | 0      | 0      | 0      | 0                            | -1.43    |
| _10615              | -         | 0           | 0      | 0      | 0      | -1.54                        | 0        |
| _10755              | -         | 0           | 0      | 0      | 0      | -1.111                       | -0.259   |
| _10925              | -         | 0           | 0      | 0      | 0      | 1.203                        | 0        |
| _10930              | -         | 0           | 0      | 0      | 0      | 1.779                        | 0        |
| _10990              | -         | 0           | 0      | 0      | 0      | 1.899                        | 0        |
| _11030              | -         | 0           | 0      | 0      | 0      | 1.263                        | 0        |
| _11045              | -         | 0           | 0      | 0      | 0      | -1.902                       | 0        |
| _11115              | -         | 0           | 0      | 0      | 0      | -1.299                       | 0        |
| _11125              | -         | 0           | 0      | 0      | 0      | 1.962                        | 0        |
| _11130              | -         | 0           | 0      | 0      | 0      | 1.472                        | 0        |
| _11190              | -         | 0           | 0      | 0      | 0      | 1.007                        | 0        |
| _11255              | -         | 0           | 0      | 0      | 0      | -3.335                       | 0        |
| _11260              | -         | 0           | 0      | 0      | 0      | -3.373                       | 0        |
| _11285              | -         | 0           | 0      | 0      | 0      | -1.14                        | 0        |
| _11310              | -         | 0           | 0      | 0      | 0      | 1.107                        | 0        |
| _11630              | -         | 0           | 0      | 0      | 0      | -2.189                       | -0.807   |

| Locus tag<br>KQU62_ | Gene Name | Regulator 1 | Reg. 2 | Reg. 3 | Reg. 4 | Log <sub>2</sub> Fold Change |          |
|---------------------|-----------|-------------|--------|--------|--------|------------------------------|----------|
|                     |           |             |        |        |        | transcriptome                | proteome |
| _11635              | -         | 0           | 0      | 0      | 0      | -1.835                       | 0        |
| _11640              | -         | 0           | 0      | 0      | 0      | -1.452                       | 0        |
| _11750              | -         | 0           | 0      | 0      | 0      | 2.71                         | 0        |
| _11805              | -         | 0           | 0      | 0      | 0      | 1.399                        | 0        |
| _12165              | -         | 0           | 0      | 0      | 0      | -1.621                       | 0        |
| _12180              | -         | 0           | 0      | 0      | 0      | 1.62                         | 0        |
| _12200              | -         | 0           | 0      | 0      | 0      | -1.275                       | 0        |
| _12250              | -         | 0           | 0      | 0      | 0      | -1.512                       | 0        |
| _12255              | -         | 0           | 0      | 0      | 0      | -1.453                       | 0        |
| _12260              | -         | 0           | 0      | 0      | 0      | -1.189                       | 0        |
| _12275              | -         | 0           | 0      | 0      | 0      | -1.749                       | 0        |
| _12280              | -         | 0           | 0      | 0      | 0      | -1.537                       | 0        |
| _12505              | -         | 0           | 0      | 0      | 0      | -1.634                       | 0        |
| _12555              | -         | 0           | 0      | 0      | 0      | -1.176                       | 0        |
| _12610              | -         | 0           | 0      | 0      | 0      | 2.745                        | 0        |
| _12615              | -         | 0           | 0      | 0      | 0      | 1.605                        | 0        |
| _12850              | -         | 0           | 0      | 0      | 0      | -1.799                       | 0        |
| _12895              | -         | 0           | 0      | 0      | 0      | 1.554                        | 0        |
| _12975              | -         | 0           | 0      | 0      | 0      | -1.242                       | 0        |
| _13035              | -         | 0           | 0      | 0      | 0      | -1.951                       | 0        |
| _13040              | -         | 0           | 0      | 0      | 0      | -2.472                       | 0        |
| _13050              | -         | 0           | 0      | 0      | 0      | -1.813                       | 0        |
| _13175              | -         | 0           | 0      | 0      | 0      | -2.082                       | 0        |
| _13200              | -         | 0           | 0      | 0      | 0      | 2.664                        | 0        |
| _13250              | -         | 0           | 0      | 0      | 0      | -1.278                       | 0        |
| _13255              | -         | 0           | 0      | 0      | 0      | -1.137                       | 0        |
| _13265              | -         | 0           | 0      | 0      | 0      | -1.939                       | -0.475   |
| _13270              | -         | 0           | 0      | 0      | 0      | -1.379                       | 0        |
| _13330              | -         | 0           | 0      | 0      | 0      | -1.061                       | 0        |
| _13335              | -         | 0           | 0      | 0      | 0      | -1.158                       | 0        |
| _13345              | -         | 0           | 0      | 0      | 0      | -1.242                       | 0        |
| _13350              | -         | 0           | 0      | 0      | 0      | -1.2                         | 0        |
| _13360              | -         | 0           | 0      | 0      | 0      | -1.572                       | 0        |
| _13365              | -         | 0           | 0      | 0      | 0      | -1.483                       | 0        |
| _13370              | -         | 0           | 0      | 0      | 0      | -1.654                       | 0        |
| _13375              | -         | 0           | 0      | 0      | 0      | -1.211                       | 0        |
| _13380              | -         | 0           | 0      | 0      | 0      | -1.528                       | 0        |
| _13385              | -         | 0           | 0      | 0      | 0      | -1.569                       | 0        |
| _13400              | -         | 0           | 0      | 0      | 0      | -1.372                       | 0        |
| _13405              | -         | 0           | 0      | 0      | 0      | -2.312                       | 0        |
| _13415              | -         | 0           | 0      | 0      | 0      | -1.5                         | 0        |
| _01225              | 23S rRNA  | 0           | 0      | 0      | 0      | 1.581                        | 0        |
| _08005              | 23S rRNA  | 0           | 0      | 0      | 0      | 1.177                        | 0        |
| _08970              | 23S rRNA  | 0           | 0      | 0      | 0      | 1.047                        | 0        |

| Locus tag<br>KQU62_ | Gene Name | Regulator 1 | Reg. 2 | Reg. 3 | Reg. 4 | Log <sub>2</sub> Fold Change |          |
|---------------------|-----------|-------------|--------|--------|--------|------------------------------|----------|
|                     |           |             |        |        |        | transcriptome                | proteome |
| _05505              | acyP      | 0           | 0      | 0      | 0      | 1.055                        | 0        |
| _08115              | ampS      | 0           | 0      | 0      | 0      | -1.174                       | -0.295   |
| _12000              | asp1      | 0           | 0      | 0      | 0      | -1.46                        | -1.97    |
| _11990              | asp3      | 0           | 0      | 0      | 0      | -1.46                        | 0        |
| _12360              | azIC      | 0           | 0      | 0      | 0      | -1.256                       | 0        |
| _12365              | azID      | 0           | 0      | 0      | 0      | -1.647                       | 0        |
| _12890              | azoR      | 0           | 0      | 0      | 0      | 1.018                        | 0        |
| _11755              | betA      | 0           | 0      | 0      | 0      | 3.033                        | 1.23     |
| _11760              | betB      | 0           | 0      | 0      | 0      | 2.822                        | 0        |
| _04280              | bshC      | 0           | 0      | 0      | 0      | 1.292                        | 0        |
| _12530              | cap8H     | 0           | 0      | 0      | 0      | 1.2                          | 0        |
| _09815              | cbiO      | 0           | 0      | 0      | 0      | 0.395                        | -1.53    |
| _11410              | cidA      | 0           | 0      | 0      | 0      | 1.111                        | 0        |
| _06970              | citZ      | 0           | 0      | 0      | 0      | 1.221                        | 0.408    |
| _11085              | cntA      | 0           | 0      | 0      | 0      | -1.175                       | 0        |
| _06790              | comC      | 0           | 0      | 0      | 0      | 1.552                        | 0        |
| _06455              | comEC     | 0           | 0      | 0      | 0      | 1.494                        | 0        |
| _06240              | comGA     | 0           | 0      | 0      | 0      | 1.039                        | 0        |
| _06235              | comGB     | 0           | 0      | 0      | 0      | 1.204                        | 0        |
| _10630              | corA2     | 0           | 0      | 0      | 0      | 1.047                        | 0.938    |
| _07425              | crcB1     | 0           | 0      | 0      | 0      | 1.912                        | 0        |
| _09085              | csH       | 0           | 0      | 0      | 0      | 1.291                        | 0        |
| _03955              | ctaA      | 0           | 0      | 0      | 0      | -1.924                       | 0        |
| _03960              | ctaB      | 0           | 0      | 0      | 0      | -1.624                       | 0        |
| _03965              | ctaM      | 0           | 0      | 0      | 0      | -1.531                       | 0        |
| _11770              | cudC      | 0           | 0      | 0      | 0      | 1.395                        | 0        |
| _11775              | cudT      | 0           | 0      | 0      | 0      | 2.682                        | 0        |
| _03810              | cydB      | 0           | 0      | 0      | 0      | -1.066                       | 0        |
| _11810              | cysG      | 0           | 0      | 0      | 0      | 1.049                        | 0        |
| _11815              | cysJ      | 0           | 0      | 0      | 0      | 1.103                        | 0.935    |
| _06050              | cysM      | 0           | 0      | 0      | 0      | 1.295                        | 0        |
| _01435              | dgk       | 0           | 0      | 0      | 0      | 0                            | 1.6      |
| _08205              | dinB      | 0           | 0      | 0      | 0      | 1.616                        | 0        |
| _04315              | divIB     | 0           | 0      | 0      | 0      | -0.302                       | 1.71     |
| _02985              | dltB      | 0           | 0      | 0      | 0      | -0.396                       | -1.24    |
| _12315              | dnaA      | 0           | 0      | 0      | 0      | 1.629                        | -0.311   |
| _05755              | dnaD      | 0           | 0      | 0      | 0      | 1.921                        | 0        |
| _12320              | dnaN      | 0           | 0      | 0      | 0      | 1.186                        | 0.229    |
| _03225              | eap       | 0           | 0      | 0      | 0      | -1.263                       | 0        |
| _10475              | emrB      | 0           | 0      | 0      | 0      | 1.298                        | 0.525    |
| _13275              | esxA      | 0           | 0      | 0      | 0      | -1.943                       | 0        |
| _05910              | fer       | 0           | 0      | 0      | 0      | 2.668                        | 0        |
| _10785              | fmhA      | 0           | 0      | 0      | 0      | -1.016                       | -0.311   |
| _03655              | fmtA      | 0           | 0      | 0      | 0      | 1.392                        | 0        |

| Locus tag<br>KQU62_ | Gene Name | Regulator 1 | Reg. 2 | Reg. 3 | Reg. 4 | Log <sub>2</sub> Fold Change |          |
|---------------------|-----------|-------------|--------|--------|--------|------------------------------|----------|
|                     |           |             |        |        |        | transcriptome                | proteome |
| _07830              | fumC      | 0           | 0      | 0      | 0      | -1.014                       | 0        |
| _08240              | gatC      | 0           | 0      | 0      | 0      | 2.172                        | 0        |
| _09990              | glcU      | 0           | 0      | 0      | 0      | 1.294                        | 0        |
| _04370              | gloA2     | 0           | 0      | 0      | 0      | 1.309                        | 0        |
| _02795              | gpmA1     | 0           | 0      | 0      | 0      | 1.278                        | 0        |
| _06435              | hemW      | 0           | 0      | 0      | 0      | 1.03                         | 0        |
| _13045              | hmp       | 0           | 0      | 0      | 0      | -2.317                       | 0        |
| _06450              | holA      | 0           | 0      | 0      | 0      | 1.285                        | 0        |
| _12955              | hptA      | 0           | 0      | 0      | 0      | -1.009                       | 0        |
| _12950              | hptS      | 0           | 0      | 0      | 0      | -1.047                       | 0        |
| _00690              | hsdM1     | 0           | 0      | 0      | 0      | -0.493                       | 3.85     |
| _12855              | hsdR      | 0           | 0      | 0      | 0      | -1.468                       | -0.569   |
| _01135              | hslO      | 0           | 0      | 0      | 0      | 1.524                        | 0.479    |
| _10675              | hsp20     | 0           | 0      | 0      | 0      | -2.358                       | 0        |
| _06965              | icd       | 0           | 0      | 0      | 0      | 1.066                        | 0        |
| _02605              | integrase | 0           | 0      | 0      | 0      | 1.154                        | 0        |
| _10605              | iruO      | 0           | 0      | 0      | 0      | 1.293                        | 0        |
| _09075              | kdpD      | 0           | 0      | 0      | 0      | -1.04                        | 0        |
| _09080              | kdpE      | 0           | 0      | 0      | 0      | -1.144                       | 0        |
| _09695              | lacR      | 0           | 0      | 0      | 0      | -1.006                       | 0        |
| _11705              | ldh2      | 0           | 0      | 0      | 0      | -2.047                       | 0        |
| _03205              | leuA2     | 0           | 0      | 0      | 0      | 2.075                        | 0        |
| _00720              | lpl1      | 0           | 0      | 0      | 0      | -1.064                       | 0        |
| _00715              | lpl5      | 0           | 0      | 0      | 0      | -1.334                       | 0        |
| _00745              | lpl7      | 0           | 0      | 0      | 0      | -1.198                       | 0        |
| _13165              | lrgA      | 0           | 0      | 0      | 0      | -6.163                       | 0        |
| _13170              | lrgB      | 0           | 0      | 0      | 0      | -6.684                       | 0        |
| _13160              | lytR      | 0           | 0      | 0      | 0      | 0.687                        | -1.71    |
| _06040              | malR      | 0           | 0      | 0      | 0      | -1.259                       | 0        |
| _09395              | manA      | 0           | 0      | 0      | 0      | 0.241                        | -2.08    |
| _03585              | menD      | 0           | 0      | 0      | 0      | 1.386                        | 0        |
| _07475              | menE      | 0           | 0      | 0      | 0      | 0.409                        | -1.56    |
| _03580              | menF      | 0           | 0      | 0      | 0      | 1.613                        | 0.513    |
| _03590              | menH      | 0           | 0      | 0      | 0      | 1.372                        | 0        |
| _00210              | mepB      | 0           | 0      | 0      | 0      | 2.389                        | 0        |
| _00310              | metE      | 0           | 0      | 0      | 0      | -1.792                       | -0.795   |
| _11300              | mhqR      | 0           | 0      | 0      | 0      | 1.118                        | 0        |
| _03050              | mnhG      | 0           | 0      | 0      | 0      | 0                            | 1.86     |
| _13230              | mnmA      | 0           | 0      | 0      | 0      | -1.648                       | -0.394   |
| _10110              | modA      | 0           | 0      | 0      | 0      | -1.007                       | 0        |
| _10105              | modB      | 0           | 0      | 0      | 0      | -1.288                       | 0        |
| _10100              | modC      | 0           | 0      | 0      | 0      | -1.216                       | 0        |
| _00800              | mpsB      | 0           | 0      | 0      | 0      | 1.018                        | -0.504   |
| _05490              | msa       | 0           | 0      | 0      | 0      | 1.147                        | 0        |

| Locus tag<br>KQU62_ | Gene Name     | Regulator 1 | Reg. 2 | Reg. 3 | Reg. 4 | Log <sub>2</sub> Fold Change |          |
|---------------------|---------------|-------------|--------|--------|--------|------------------------------|----------|
|                     |               |             |        |        |        | transcriptome                | proteome |
| _05500              | msaA          | 0           | 0      | 0      | 0      | 1.299                        | 0        |
| _08050              | msbA          | 0           | 0      | 0      | 0      | 1.415                        | 0        |
| _03000              | nfu           | 0           | 0      | 0      | 0      | 1.189                        | 0        |
| _05670              | norB          | 0           | 0      | 0      | 0      | -2.852                       | 0        |
| _05750              | nth           | 0           | 0      | 0      | 0      | 1.777                        | 1.29     |
| _07105              | ohr           | 0           | 0      | 0      | 0      | 1.051                        | 0        |
| _13030              | opp-5A        | 0           | 0      | 0      | 0      | -2.198                       | 0.629    |
| _02235              | pabA          | 0           | 0      | 0      | 0      | 1.02                         | 0        |
| _01235              | pdxR          | 0           | 0      | 0      | 0      | 1.73                         | 0        |
| _06165              | pepQ2         | 0           | 0      | 0      | 0      | 1.039                        | 0        |
| _11180              | pgcA          | 0           | 0      | 0      | 0      | 1.266                        | 0        |
| _08460              | phage-related | 0           | 0      | 0      | 0      | 2.136                        | 0        |
| _08475              | phage-rel.    | 0           | 0      | 0      | 0      | 1.053                        | 0        |
| _08600              | phage-rel.    | 0           | 0      | 0      | 0      | 1.405                        | 0        |
| _08615              | phage-rel.    | 0           | 0      | 0      | 0      | 2.087                        | 0        |
| _08620              | phage-rel.    | 0           | 0      | 0      | 0      | 2.159                        | 0        |
| _08625              | phage-rel.    | 0           | 0      | 0      | 0      | 1.503                        | 0        |
| _08630              | phage-rel.    | 0           | 0      | 0      | 0      | 1.189                        | 0        |
| _08635              | phage-rel.    | 0           | 0      | 0      | 0      | 1.206                        | 0        |
| _08645              | phage-rel.    | 0           | 0      | 0      | 0      | 1.083                        | 0        |
| _08660              | phage-rel.    | 0           | 0      | 0      | 0      | 1.163                        | 0        |
| _08675              | phage-rel.    | 0           | 0      | 0      | 0      | 1.165                        | 0        |
| _08700              | phage-rel.    | 0           | 0      | 0      | 0      | 1.125                        | 0        |
| _08715              | phage-rel.    | 0           | 0      | 0      | 0      | 1.367                        | 0        |
| _12590              | phnC          | 0           | 0      | 0      | 0      | -1.166                       | 0        |
| _03890              | potD          | 0           | 0      | 0      | 0      | 0                            | 1.15     |
| _10780              | priA          | 0           | 0      | 0      | 0      | -1.005                       | 0        |
| _06410              | prmA          | 0           | 0      | 0      | 0      | 3.492                        | 1.62     |
| _05435              | pstS          | 0           | 0      | 0      | 0      | -1.246                       | 0        |
| _03750              | purD          | 0           | 0      | 0      | 0      | -1.809                       | -0.981   |
| _03700              | purE          | 0           | 0      | 0      | 0      | -0.401                       | -1.01    |
| _03730              | purF          | 0           | 0      | 0      | 0      | -1.469                       | -1.36    |
| _03745              | purH          | 0           | 0      | 0      | 0      | -1.902                       | -1.16    |
| _03705              | purK          | 0           | 0      | 0      | 0      | -0.641                       | -1.01    |
| _03725              | purL          | 0           | 0      | 0      | 0      | -1.269                       | -1.38    |
| _03735              | purM          | 0           | 0      | 0      | 0      | -1.738                       | -1.12    |
| _03740              | purN          | 0           | 0      | 0      | 0      | -1.781                       | -1.84    |
| _03720              | purQ          | 0           | 0      | 0      | 0      | -1.066                       | -1.21    |
| _03715              | purS          | 0           | 0      | 0      | 0      | -0.743                       | -4.12    |
| _03670              | qoxB          | 0           | 0      | 0      | 0      | -1.218                       | 0        |
| _03665              | qoxC          | 0           | 0      | 0      | 0      | -1.044                       | 0        |
| _03660              | qoxD          | 0           | 0      | 0      | 0      | -1.094                       | 0        |
| _09295              | qsrR          | 0           | 0      | 0      | 0      | 0.662                        | -1.68    |

| Locus tag<br>KQU62_ | Gene Name | Regulator 1 | Reg. 2 | Reg. 3 | Reg. 4 | Log <sub>2</sub> Fold Change |          |
|---------------------|-----------|-------------|--------|--------|--------|------------------------------|----------|
|                     |           |             |        |        |        | transcriptome                | proteome |
| _04135              | racE      | 0           | 0      | 0      | 0      | 1.387                        | 0.408    |
| _06785              | radC      | 0           | 0      | 0      | 0      | 1.049                        | 0        |
| _04755              | rbfA      | 0           | 0      | 0      | 0      | 1.027                        | 0.465    |
| _04530              | recG      | 0           | 0      | 0      | 0      | 0.501                        | -1.04    |
| _02275              | recQ1     | 0           | 0      | 0      | 0      | 0.979                        | -1.54    |
| _05660              | rnhA      | 0           | 0      | 0      | 0      | 1.665                        | 0        |
| _12305              | rnpA      | 0           | 0      | 0      | 0      | 1.558                        | 0        |
| _01340              | rplA      | 0           | 0      | 0      | 0      | 1.628                        | 0        |
| _09940              | rplB      | 0           | 0      | 0      | 0      | 1.053                        | 0        |
| _09950              | rplD      | 0           | 0      | 0      | 0      | 1.065                        | 0        |
| _01335              | rplK      | 0           | 0      | 0      | 0      | 1.638                        | 0.207    |
| _09945              | rplW      | 0           | 0      | 0      | 0      | 1.129                        | 0        |
| _12310              | rpmH      | 0           | 0      | 0      | 0      | 1.489                        | 0        |
| _07095              | rpsD      | 0           | 0      | 0      | 0      | 1.063                        | 0.433    |
| _09960              | rpsJ      | 0           | 0      | 0      | 0      | 1.48                         | 0        |
| _04500              | rsgA      | 0           | 0      | 0      | 0      | 0                            | -1.05    |
| _06405              | rsmE      | 0           | 0      | 0      | 0      | 1.837                        | 0        |
| _02000              | sarX      | 0           | 0      | 0      | 0      | -4.363                       | 0        |
| _12010              | sasA      | 0           | 0      | 0      | 0      | -1.756                       | -1.48    |
| _12550              | sasD      | 0           | 0      | 0      | 0      | -3.247                       | 0        |
| _13150              | scdA      | 0           | 0      | 0      | 0      | -3.085                       | 0        |
| _10390              | sdpC      | 0           | 0      | 0      | 0      | 2.201                        | 0.544    |
| _01455              | sdrC      | 0           | 0      | 0      | 0      | -1.246                       | 0        |
| _01460              | sdrD      | 0           | 0      | 0      | 0      | -1.844                       | 0        |
| _01465              | sdrE      | 0           | 0      | 0      | 0      | -1.583                       | 0        |
| _12005              | secY2     | 0           | 0      | 0      | 0      | -1.24                        | 0        |
| _07670              | sei       | 0           | 0      | 0      | 0      | 1.605                        | 0        |
| _02700              | sel       | 0           | 0      | 0      | 0      | -1.6                         | 0        |
| _07675              | sem       | 0           | 0      | 0      | 0      | 1.944                        | 0        |
| _07660              | sen       | 0           | 0      | 0      | 0      | 1.141                        | 0        |
| _07680              | seo       | 0           | 0      | 0      | 0      | 3.286                        | 0        |
| _12355              | serS      | 0           | 0      | 0      | 0      | -1.354                       | -0.404   |
| _07665              | seu       | 0           | 0      | 0      | 0      | 1.395                        | 0        |
| _06065              | spcT      | 0           | 0      | 0      | 0      | 1.041                        | 0        |
| _10280              | spdB      | 0           | 0      | 0      | 0      | 1.502                        | 0        |
| _00710              | SPIN      | 0           | 0      | 0      | 0      | -1.774                       | 0        |
| _07595              | spIF      | 0           | 0      | 0      | 0      | 1.248                        | 0        |
| _03325              | spxA      | 0           | 0      | 0      | 0      | -0.207                       | 1.98     |
| _04215              | ssl12     | 0           | 0      | 0      | 0      | 1.089                        | 0        |
| _04220              | ssl13     | 0           | 0      | 0      | 0      | 1.271                        | 0        |
| _04225              | ssl14     | 0           | 0      | 0      | 0      | 1.131                        | 0        |
| _03610              | sspA      | 0           | 0      | 0      | 0      | -1.033                       | 0        |
| _03605              | sspB      | 0           | 0      | 0      | 0      | -1.544                       | 0        |
| _08280              | sspB2     | 0           | 0      | 0      | 0      | -1.086                       | 0        |

| Locus tag<br>KQU62_ | Gene Name | Regulator 1 | Reg. 2 | Reg. 3 | Reg. 4 | Log <sub>2</sub> Fold Change |          |
|---------------------|-----------|-------------|--------|--------|--------|------------------------------|----------|
|                     |           |             |        |        |        | transcriptome                | proteome |
| _11040              | stbD      | 0           | 0      | 0      | 0      | 1.835                        | 0        |
| _05550              | sucA      | 0           | 0      | 0      | 0      | -1.303                       | -0.246   |
| _03020              | sufA      | 0           | 0      | 0      | 0      | 1.04                         | 0        |
| _10625              | tetR      | 0           | 0      | 0      | 0      | 1.054                        | 0        |
| _06710              | tgt       | 0           | 0      | 0      | 0      | 1.084                        | 0        |
| _07955              | tRNA-Ala  | 0           | 0      | 0      | 0      | 1.611                        | 0        |
| _01200              | tRNA-Arg  | 0           | 0      | 0      | 0      | 1.003                        | 0        |
| _07965              | tRNA-Arg  | 0           | 0      | 0      | 0      | 1.96                         | 0        |
| _07695              | tRNA-Asn  | 0           | 0      | 0      | 0      | 1.321                        | 0        |
| _09515              | tRNA-Asn  | 0           | 0      | 0      | 0      | 2.472                        | 0        |
| _07715              | tRNA-Asp  | 0           | 0      | 0      | 0      | 1.735                        | 0        |
| _07920              | tRNA-Asp  | 0           | 0      | 0      | 0      | 1.288                        | 0        |
| _07935              | tRNA-Asp  | 0           | 0      | 0      | 0      | 1.584                        | 0        |
| _07885              | tRNA-Cys  | 0           | 0      | 0      | 0      | 1.903                        | 0        |
| _07890              | tRNA-Gln  | 0           | 0      | 0      | 0      | 2.116                        | 0        |
| _07690              | tRNA-Glu  | 0           | 0      | 0      | 0      | 3.06                         | 0        |
| _09510              | tRNA-Glu  | 0           | 0      | 0      | 0      | 1.316                        | 0        |
| _07880              | tRNA-Gly  | 0           | 0      | 0      | 0      | 1.771                        | 0        |
| _07975              | tRNA-Gly  | 0           | 0      | 0      | 0      | 1.401                        | 0        |
| _08980              | tRNA-Gly  | 0           | 0      | 0      | 0      | 1.242                        | 0        |
| _07705              | tRNA-His  | 0           | 0      | 0      | 0      | 1.333                        | 0        |
| _07895              | tRNA-His  | 0           | 0      | 0      | 0      | 1.774                        | 0        |
| _07945              | tRNA-Ile  | 0           | 0      | 0      | 0      | 1.751                        | 0        |
| _08015              | tRNA-Ile  | 0           | 0      | 0      | 0      | 1.126                        | 0        |
| _07875              | tRNA-Leu  | 0           | 0      | 0      | 0      | 1.782                        | 0        |
| _07970              | tRNA-Leu  | 0           | 0      | 0      | 0      | 1.961                        | 0        |
| _07980              | tRNA-Leu  | 0           | 0      | 0      | 0      | 1.746                        | 0        |
| _08985              | tRNA-Leu  | 0           | 0      | 0      | 0      | 1.905                        | 0        |
| _07985              | tRNA-Lys  | 0           | 0      | 0      | 0      | 2.335                        | 0        |
| _09490              | tRNA-Lys  | 0           | 0      | 0      | 0      | 1.497                        | 0        |
| _07720              | tRNA-Met  | 0           | 0      | 0      | 0      | 2.581                        | 0        |
| _07925              | tRNA-Met  | 0           | 0      | 0      | 0      | 2.012                        | 0        |
| _07950              | tRNA-Met  | 0           | 0      | 0      | 0      | 1.745                        | 0        |
| _07710              | tRNA-Phe  | 0           | 0      | 0      | 0      | 1.212                        | 0        |
| _07915              | tRNA-Phe  | 0           | 0      | 0      | 0      | 1.428                        | 0        |
| _07960              | tRNA-Pro  | 0           | 0      | 0      | 0      | 1.285                        | 0        |
| _07685              | tRNA-Ser  | 0           | 0      | 0      | 0      | 3.089                        | 0        |
| _07930              | tRNA-Ser  | 0           | 0      | 0      | 0      | 2.099                        | 0        |
| _07940              | tRNA-Ser  | 0           | 0      | 0      | 0      | 1.763                        | 0        |
| _01180              | tRNA-Thr  | 0           | 0      | 0      | 0      | 1.05                         | 0        |
| _07910              | tRNA-Thr  | 0           | 0      | 0      | 0      | 1.602                        | 0        |
| _07990              | tRNA-Thr  | 0           | 0      | 0      | 0      | 1.955                        | 0        |
| _07900              | tRNA-Trp  | 0           | 0      | 0      | 0      | 1.943                        | 0        |
| _07905              | tRNA-Tyr  | 0           | 0      | 0      | 0      | 1.786                        | 0        |



| Locus tag<br>KQU62_ | Gene Name       | Regulator 1 | Reg. 2 | Reg. 3 | Reg. 4 | Log <sub>2</sub> Fold Change |          |
|---------------------|-----------------|-------------|--------|--------|--------|------------------------------|----------|
|                     |                 |             |        |        |        | transcriptome                | proteome |
| _09500              | tRNA-Tyr        | 0           | 0      | 0      | 0      | 1.736                        | 0        |
| _01175              | tRNA-Val        | 0           | 0      | 0      | 0      | 1.894                        | 0        |
| _07995              | tRNA-Val        | 0           | 0      | 0      | 0      | 2.686                        | 0        |
| _09505              | tRNA-Val        | 0           | 0      | 0      | 0      | 1.23                         | 0        |
| _09800              | truA            | 0           | 0      | 0      | 0      | 0.619                        | -1.9     |
| _02500              | trxB            | 0           | 0      | 0      | 0      | 1.156                        | 0.29     |
| _06565              | udk             | 0           | 0      | 0      | 0      | 1.097                        | 0        |
| _07045              | uspA1           | 0           | 0      | 0      | 0      | -1.298                       | 0        |
| _01040              | veg             | 0           | 0      | 0      | 0      | 1.166                        | 0        |
| _02735              | vwb             | 0           | 0      | 0      | 0      | 1.436                        | 0        |
| _08120              | yfkK            | 0           | 0      | 0      | 0      | -1.479                       | 0        |
| _04010              | ylbN            | 0           | 0      | 0      | 0      | 1.401                        | 0        |
| _11035              | yoeB<br>(toxin) | 0           | 0      | 0      | 0      | 1.759                        | 0        |
| _07460              | ytkD            | 0           | 0      | 0      | 0      | 1.229                        | 0        |
| _01610              | ywzC            | 0           | 0      | 0      | 0      | 1.5                          | 0        |
| _08810              | hld             | AgrA        | 0      | 0      | 0      | 1.049                        | 0        |
| _08835              | agrA            | AgrA        | CodY   | 0      | 0      | -1.967                       | 0        |
| _03120              | argH            | ArgR        | CodY   | 0      | 0      | -2.976                       | 0        |
| _07860              | artQ            | ArgR        | CodY   | 0      | 0      | -3.261                       | 0        |
| _07865              | artM            | ArgR        | CodY   | 0      | 0      | -3.006                       | 0        |
| _11890              | arcR            | ArgR        | CcpA   | Rex    | ArcR   | -1.403                       | 0        |
| _11895              | arcC            | ArgR        | CcpA   | Rex    | ArcR   | -1.34                        | 0        |
| _11900              | arcD            | ArgR        | CcpA   | Rex    | ArcR   | -2.621                       | 0        |
| _11905              | arcB            | ArgR        | CcpA   | Rex    | ArcR   | -2.38                        | 0        |
| _11910              | arcA            | ArgR        | CcpA   | Rex    | ArcR   | -3.143                       | 0        |
| _12790              | argJ            | ArgR        | 0      | 0      | 0      | -1.074                       | 0        |
| _12795              | argC            | ArgR        | 0      | 0      | 0      | -1.174                       | 0        |
| _12800              | argD            | ArgR        | 0      | 0      | 0      | -1.254                       | 0        |
| _13185              | -               | BglR        | 0      | 0      | 0      | 2.482                        | 0        |
| _13190              | bglA            | BglR        | 0      | 0      | 0      | 1.866                        | 0        |
| _01520              | vraA            | BirA        | 0      | 0      | 0      | 1.529                        | 0        |
| _01530              | vraC            | BirA        | 0      | 0      | 0      | 1.101                        | 0        |
| _01535              | vraP            | BirA        | 0      | 0      | 0      | 1.74                         | 0        |
| _00215              | glpT            | CcpA        | 0      | 0      | 0      | -1.59                        | 0        |
| _01400              | kbl             | CcpA        | 0      | 0      | 0      | -1.252                       | 0        |
| _07175              | acuA            | CcpA        | CodY   | 0      | 0      | -1.047                       | 0        |
| _07340              | putA            | CcpA        | 0      | 0      | 0      | -1.837                       | 0        |
| _08245              | putP            | CcpA        | 0      | 0      | 0      | -1.228                       | 0        |
| _10440              | gltS            | CcpA        | 0      | 0      | 0      | 1.758                        | 0        |
| _11210              | gntP            | CcpA        | GntR   | 0      | 0      | -1.066                       | 0        |
| _11215              | gntK            | CcpA        | GntR   | 0      | 0      | -1.082                       | 0        |
| _11220              | gntR            | CcpA        | GntR   | 0      | 0      | -2.658                       | 0        |
| _11940              | manR            | CcpA        | 0      | 0      | 0      | -1.023                       | 0        |

| Locus tag<br>KQU62_ | Gene Name | Regulator 1 | Reg. 2 | Reg. 3 | Reg. 4 | Log <sub>2</sub> Fold Change |          |
|---------------------|-----------|-------------|--------|--------|--------|------------------------------|----------|
|                     |           |             |        |        |        | transcriptome                | proteome |
| _12090              | lip       | CcpA        | 0      | 0      | 0      | -2.027                       | 0        |
| _12350              | hutH      | CcpA        | 0      | 0      | 0      | -1.093                       | 0        |
| _12825              | ptsG      | CcpA        | 0      | 0      | 0      | -2.246                       | -0.335   |
| _12940              | uhpT      | CcpA        | 0      | 0      | 0      | -1.537                       | 0        |
| _12960              | pflB      | CcpA        | Rex    | 0      | 0      | -4.222                       | 0        |
| _02310              | dtpT      | CodY        | 0      | 0      | 0      | -1.414                       | -0.277   |
| _02435              | raiA      | CodY        | 0      | 0      | 0      | -1.029                       | 0        |
| _03125              | argG      | CodY        | ArgR   | 0      | 0      | -2.811                       | 0        |
| _03485              | -         | CodY        | 0      | 0      | 0      | -1.73                        | 0        |
| _05315              | trpE      | CodY        | T-box  | 0      | 0      | 1.333                        | 0        |
| _05675              | -         | CodY        | 0      | 0      | 0      | -4                           | 0        |
| _05680              | tdcB      | CodY        | 0      | 0      | 0      | -4.544                       | 0        |
| _06285              | sodA      | CodY        | 0      | 0      | 0      | 1.377                        | 0.659    |
| _08915              | ilvD      | CodY        | 0      | 0      | 0      | -1.262                       | 0        |
| _08920              | ilvB      | CodY        | 0      | 0      | 0      | -1.463                       | 0        |
| _08925              | ilvN      | CodY        | 0      | 0      | 0      | -1.981                       | 0        |
| _08930              | ilvC      | CodY        | 0      | 0      | 0      | -2.007                       | 0        |
| _08935              | leuA      | CodY        | 0      | 0      | 0      | -1.886                       | 0        |
| _08940              | leuB      | CodY        | 0      | 0      | 0      | -1.136                       | 0        |
| _08950              | leuD      | CodY        | 0      | 0      | 0      | -1.202                       | 0        |
| _10970              | opuCD     | CodY        | 0      | 0      | 0      | -1.651                       | 0        |
| _10975              | opuCC     | CodY        | 0      | 0      | 0      | -1.749                       | 0        |
| _10980              | opuCB     | CodY        | 0      | 0      | 0      | -1.926                       | 0        |
| _10985              | opuCA     | CodY        | 0      | 0      | 0      | -1.981                       | -0.347   |
| _11710              | -         | CodY        | 0      | 0      | 0      | -1.442                       | 0        |
| _11715              | gabT      | CodY        | 0      | 0      | 0      | -1.618                       | 0        |
| _11720              | -         | CodY        | SigB   | 0      | 0      | -1.843                       | 0        |
| _11925              | aur       | CodY        | 0      | 0      | 0      | -1.618                       | 0        |
| _12545              | sodM      | CodY        | 0      | 0      | 0      | -1.052                       | 0        |
| _12625              | cap5A     | CodY        | SigB   | 0      | 0      | -1.901                       | 0        |
| _12630              | cap5B     | CodY        | SigB   | 0      | 0      | -1.463                       | 0        |
| _12635              | cap5C     | CodY        | SigB   | 0      | 0      | -2.086                       | 0        |
| _12640              | cap5D     | CodY        | SigB   | 0      | 0      | -2.147                       | 0        |
| _12645              | cap5E     | CodY        | SigB   | 0      | 0      | -1.981                       | 0        |
| _12650              | cap5F     | CodY        | SigB   | 0      | 0      | -1.825                       | 0        |
| _12655              | cap5G     | CodY        | SigB   | 0      | 0      | -1.797                       | 0        |
| _12660              | cap8I     | CodY        | SigB   | 0      | 0      | -1.57                        | 0        |
| _12665              | cap8J     | CodY        | SigB   | 0      | 0      | -1.293                       | 0        |
| _01255              | ctsR      | CtsR        | 0      | 0      | 0      | 2.93                         | 4.18     |
| _01260              | mcsA      | CtsR        | 0      | 0      | 0      | 2.887                        | 3.29     |
| _01265              | mcsB      | CtsR        | 0      | 0      | 0      | 3.19                         | 3.3      |
| _01270              | clpC      | CtsR        | 0      | 0      | 0      | 3.247                        | 2.44     |
| _02520              | clpP      | CtsR        | 0      | 0      | 0      | 3.162                        | 1.97     |
| _03195              | clpB      | CtsR        | 0      | 0      | 0      | 4.013                        | 4.06     |

| Locus tag<br>KQU62_ | Gene Name | Regulator 1 | Reg. 2 | Reg. 3 | Reg. 4 | Log <sub>2</sub> Fold Change |          |
|---------------------|-----------|-------------|--------|--------|--------|------------------------------|----------|
|                     |           |             |        |        |        | transcriptome                | proteome |
| _06415              | dnaJ      | CtsR        | HrcA   | 0      | 0      | 3.49                         | 2        |
| _06420              | dnaK      | CtsR        | HrcA   | 0      | 0      | 3.507                        | 1.87     |
| _06425              | grpE      | CtsR        | HrcA   | 0      | 0      | 3.333                        | 1.58     |
| _06430              | hrcA      | CtsR        | HrcA   | 0      | 0      | 3.122                        | 2.27     |
| _08780              | groL      | CtsR        | HrcA   | 0      | 0      | 3.055                        | 1.74     |
| _08785              | groES     | CtsR        | HrcA   | 0      | 0      | 3.169                        | 1.43     |
| _00835              | mccA      | CymR        | 0      | 0      | 0      | 1.174                        | 0        |
| _00845              | metN1     | CymR        | 0      | 0      | 0      | -1.86                        | 0        |
| _00850              | metP2     | CymR        | 0      | 0      | 0      | -1.812                       | 0        |
| _00855              | gmpC      | CymR        | 0      | 0      | 0      | -1.78                        | -0.703   |
| _08865              | -         | CymR        | 0      | 0      | 0      | 0                            | -2.03    |
| _10795              | tcyB      | CymR        | 0      | 0      | 0      | -1.032                       | 0        |
| _10800              | tcyA      | CymR        | 0      | 0      | 0      | -1.059                       | 0        |
| _12750              | -         | CymR        | 0      | 0      | 0      | 0                            | -1.29    |
| _05915              | ribU      | FMN-box     | 0      | 0      | 0      | 1.376                        | 0        |
| _07345              | ribH      | FMN-box     | 0      | 0      | 0      | 0                            | -2       |
| _07350              | ribA      | FMN-box     | 0      | 0      | 0      | -1.774                       | 0        |
| _07355              | ribB      | FMN-box     | 0      | 0      | 0      | -1.932                       | 0        |
| _02160              | fruR      | FruR        | CcpA   | 0      | 0      | -1.315                       | 0        |
| _02165              | pfkB      | FruR        | CcpA   | 0      | 0      | -1.249                       | 0        |
| _02170              | fruA      | FruR        | CcpA   | 0      | 0      | -1.07                        | 0        |
| _00260              | tatC      | Fur         | 0      | 0      | 0      | 1.509                        | 0        |
| _00265              | tatA      | Fur         | 0      | 0      | 0      | 1.021                        | 0        |
| _01895              | fhuC      | Fur         | 0      | 0      | 0      | 1.259                        | 0        |
| _04030              | isdC      | Fur         | 0      | 0      | 0      | 1.363                        | 0        |
| _04035              | isdD      | Fur         | 0      | 0      | 0      | 1.399                        | 0        |
| _04040              | isdE      | Fur         | 0      | 0      | 0      | 1.089                        | 0        |
| _04045              | isdF      | Fur         | 0      | 0      | 0      | 1.039                        | 0        |
| _09590              | htsB      | Fur         | 0      | 0      | 0      | 1.106                        | 0        |
| _09595              | htsA      | Fur         | 0      | 0      | 0      | 1.576                        | 0        |
| _12460              | sbnA      | Fur         | 0      | 0      | 0      | 0                            | -1.01    |
| _09440              | glmS      | glms leader | 0      | 0      | 0      | -2.295                       | 0        |
| _08855              | nrgA      | GlnR        | CodY   | 0      | 0      | 1.74                         | 0        |
| _00890              | gltC      | GltC        | CodY   | 0      | 0      | 1.998                        | 0        |
| _03620              | -         | GraR        | 0      | 0      | 0      | 1.439                        | 0        |
| _03675              | qoxA      | GraR        | 0      | 0      | 0      | -1.188                       | 0        |
| _05275              | mprF      | GraR        | 0      | 0      | 0      | -0.285                       | -1.56    |
| _08795              | sdrH      | GraR        | 0      | 0      | 0      | 1.173                        | 0        |
| _12780              | -         | GraR        | 0      | 0      | 0      | -2.054                       | 0        |
| _03035              | nhaC      | HisR        | 0      | 0      | 0      | 1.815                        | 0        |
| _10525              | hrtB      | HssR        | 0      | 0      | 0      | 1.205                        | 0        |
| _01345              | rplJ      | L leader    | 0      | 0      | 0      | -1.097                       | 0        |
| _04600              | rplS      | L leader    | 0      | 0      | 0      | 1.734                        | 0.344    |
| _09690              | lacA      | LacR        | 0      | 0      | 0      | 0                            | 2.46     |

| Locus tag<br>KQU62_ | Gene Name | Regulator 1         | Reg. 2 | Reg. 3 | Reg. 4 | Log <sub>2</sub> Fold Change |          |
|---------------------|-----------|---------------------|--------|--------|--------|------------------------------|----------|
|                     |           |                     |        |        |        | transcriptome                | proteome |
| _12900              | malk      | MalR                | CcpA   | 0      | 0      | -2.113                       | 0        |
| _00200              | mepR      | MepR                | 0      | 0      | 0      | 1.443                        | 0        |
| _00205              | mepA      | MepR                | 0      | 0      | 0      | 2.955                        | 0        |
| _01825              | mntA      | MntR                | 0      | 0      | 0      | 0                            | -1.27    |
| _03905              | mntH      | MntR                | 0      | 0      | 0      | -0.667                       | 1.52     |
| _09445              | mtlF      | MtlR                | 0      | 0      | 0      | -1.129                       | 0        |
| _12830              | mupG      | MurR                | CcpA   | 0      | 0      | -1.421                       | 0        |
| _12835              | murQ      | MurR                | 0      | 0      | 0      | -1.162                       | 0        |
| _00105              | nanA      | NanR                | CcpA   | 0      | 0      | -1.09                        | 0        |
| _11790              | nrdG      | NrdR                | 0      | 0      | 0      | -1.231                       | 0        |
| _11795              | nrdD      | NrdR                | 0      | 0      | 0      | -1.14                        | 0        |
| _01240              | pdxS      | PdxR                | 0      | 0      | 0      | -1.07                        | -0.395   |
| _01245              | pdxT      | PdxR                | 0      | 0      | 0      | -1.27                        | -0.431   |
| _02230              | queC      | PreQ1<br>riboswitch | 0      | 0      | 0      | 1.656                        | 0        |
| _05655              | -         | PreQ1<br>riboswitch | 0      | 0      | 0      | 1.037                        | 0        |
| _04390              | uraA      | pyrR leader         | 0      | 0      | 0      | -2.236                       | 0        |
| _04395              | pyrB      | pyrR leader         | 0      | 0      | 0      | -2.825                       | 0        |
| _04400              | pyrC      | pyrR leader         | 0      | 0      | 0      | -2.233                       | -0.504   |
| _04405              | carA      | pyrR leader         | 0      | 0      | 0      | -2.402                       | -0.639   |
| _04410              | carB      | pyrR leader         | 0      | 0      | 0      | -2.615                       | -0.601   |
| _04415              | pyrF      | pyrR leader         | 0      | 0      | 0      | -2.882                       | 0        |
| _04420              | pyrE      | pyrR leader         | 0      | 0      | 0      | -2.61                        | 0        |
| _04425              | -         | pyrR leader         | 0      | 0      | 0      | -2.562                       | 0        |
| _00055              | lldP      | Rex                 | 0      | 0      | 0      | -2.286                       | 0        |
| _01680              | adhP      | Rex                 | 0      | 0      | 0      | -2.009                       | 0        |
| _05685              | ald       | Rex                 | 0      | 0      | 0      | -1.414                       | 0        |
| _10570              | lctP_2    | Rex                 | 0      | 0      | 0      | -2.477                       | 0        |
| _10680              | narK      | Rex                 | NreC   | 0      | 0      | -6.735                       | 0        |
| _10695              | nreC      | Rex                 | NreC   | 0      | 0      | -1.326                       | -0.565   |
| _10700              | nreB      | Rex                 | NreC   | 0      | 0      | -1.743                       | -0.524   |
| _10705              | nreA      | Rex                 | NreC   | 0      | 0      | -2.249                       | 0        |
| _10710              | narI      | Rex                 | NreC   | 0      | 0      | -5.24                        | -1.24    |
| _10715              | narJ      | Rex                 | NreC   | 0      | 0      | -6.649                       | 0        |
| _10720              | narH      | Rex                 | NreC   | 0      | 0      | -7.31                        | 0        |
| _10725              | narG      | Rex                 | NreC   | 0      | 0      | -5.854                       | 0        |
| _10730              | nasF      | Rex                 | NreC   | 0      | 0      | -7.124                       | 0        |
| _10735              | nasE      | Rex                 | NreC   | 0      | 0      | -7.628                       | 0        |
| _10740              | nasD      | Rex                 | NreC   | 0      | 0      | -7.174                       | 0        |
| _10745              | nirR      | Rex                 | NreC   | 0      | 0      | -6.783                       | 0        |
| _11145              | -         | Rex                 | 0      | 0      | 0      | -3.032                       | 0        |
| _11320              | ddh       | Rex                 | 0      | 0      | 0      | -1.735                       | 0        |
| _12620              | adhE      | Rex                 | 0      | 0      | 0      | -3.104                       | 0        |

| Locus tag<br>KQU62_ | Gene Name  | Regulator 1 | Reg. 2              | Reg. 3 | Reg. 4 | Log <sub>2</sub> Fold Change |          |
|---------------------|------------|-------------|---------------------|--------|--------|------------------------------|----------|
|                     |            |             |                     |        |        | transcriptome                | proteome |
| _12965              | pfIA       | Rex         | CcpA                | 0      | 0      | -4.824                       | 0        |
| _13055              | ldh1/ lctE | Rex         | 0                   | 0      | 0      | -2.9                         | 0        |
| _07325              | rot        | RNAIII      | 0                   | 0      | 0      | -1.505                       | 0        |
| _08470              | sak        | SaeR        | 0                   | 0      | 0      | -1.048                       | 0        |
| _08745              | lukF       | SaeR        | 0                   | 0      | 0      | -1.183                       | 0        |
| _12935              | -          | SaeR        | 0                   | 0      | 0      | -1.653                       | 0        |
| _02855              | metN       | S-box       | 0                   | 0      | 0      | -1.232                       | -0.78    |
| _02860              | metI2      | S-box       | 0                   | 0      | 0      | -1.281                       | 0        |
| _02865              | metQ       | S-box       | 0                   | 0      | 0      | -1.557                       | -0.614   |
| _01760              | -          | SigB        | 0                   | 0      | 0      | 2.678                        | 0        |
| _01765              | mnhA2      | SigB        | 0                   | 0      | 0      | 1.743                        | 0        |
| _01770              | mnhB2      | SigB        | 0                   | 0      | 0      | 1.694                        | 0        |
| _01775              | mnhC2      | SigB        | 0                   | 0      | 0      | 1.805                        | 0        |
| _01780              | mnhD2      | SigB        | 0                   | 0      | 0      | 1.765                        | 0        |
| _01785              | mnhE       | SigB        | 0                   | 0      | 0      | 1.573                        | 0        |
| _01790              | mnhF2      | SigB        | 0                   | 0      | 0      | 1.708                        | 0        |
| _01795              | mnhG2      | SigB        | 0                   | 0      | 0      | 1.602                        | 0        |
| _02220              | queE       | SigB        | PreQ1<br>riboswitch | 0      | 0      | 1.504                        | 0        |
| _02225              | queD       | SigB        | PreQ1<br>riboswitch | 0      | 0      | 1.567                        | 0        |
| _02515              | whiA       | SigB        | 0                   | 0      | 0      | 0.609                        | 1.32     |
| _02915              | mpfB       | SigB        | 0                   | 0      | 0      | 1.393                        | 0        |
| _02920              | fabK       | SigB        | 0                   | 0      | 0      | 1.506                        | 0        |
| _03560              | -          | SigB        | 0                   | 0      | 0      | 1.378                        | 0        |
| _07025              | -          | SigB        | 0                   | 0      | 0      | -1.004                       | -0.335   |
| _08095              | -          | SigB        | 0                   | 0      | 0      | -0.223                       | 1.19     |
| _08755              | -          | SigB        | 0                   | 0      | 0      | -1.06                        | 0        |
| _09380              | -          | SigB        | 0                   | 0      | 0      | -1.095                       | 0        |
| _09400              | -          | SigB        | 0                   | 0      | 0      | -1.024                       | 0        |
| _09460              | mtlD       | SigB        | MtlR                | 0      | 0      | -1.359                       | 0        |
| _09630              | sspC       | SigB        | 0                   | 0      | 0      | -1.141                       | 0        |
| _09635              | amaP       | SigB        | 0                   | 0      | 0      | -1.008                       | 0        |
| _09640              | opuD2      | SigB        | 0                   | 0      | 0      | -1.496                       | 0        |
| _09755              | map-w      | SigB        | 0                   | 0      | 0      | -1.022                       | 0        |
| _10580              | -          | SigB        | 0                   | 0      | 0      | -1.002                       | -0.542   |
| _11445              | clpL       | SigB        | 0                   | 0      | 0      | -1.527                       | 0        |
| _11515              | crtN       | SigB        | 0                   | 0      | 0      | -0.64                        | -1.25    |
| _11530              | crtI       | SigB        | 0                   | 0      | 0      | -1.016                       | 0        |
| _11535              | crtO       | SigB        | 0                   | 0      | 0      | -1.13                        | 0        |
| _00910              | treP       | TreR        | CcpA                | 0      | 0      | -1.116                       | 0        |
| _00915              | treC       | TreR        | CcpA                | 0      | 0      | -0.53                        | -1.36    |
| _00860              | sle1       | WalR        | 0                   | 0      | 0      | 1.756                        | 0.368    |
| _01985              | amiD7      | WalR        | 0                   | 0      | 0      | 1.133                        | 0        |

| Locus tag<br>KQU62_ | Gene Name | Regulator 1 | Reg. 2 | Reg. 3 | Reg. 4 | Log <sub>2</sub> Fold Change |          |
|---------------------|-----------|-------------|--------|--------|--------|------------------------------|----------|
|                     |           |             |        |        |        | transcriptome                | proteome |
| _03635              | atl       | WalR        | SigB   | 0      | 0      | 2.279                        | 0        |
| _09160              | sceD      | WalR        | 0      | 0      | 0      | 2.22                         | 0        |
| _10205              | ssaA      | WalR        | GraR   | 0      | 0      | 2.439                        | 0        |
| _10230              | ssaA2     | WalR        | 0      | 0      | 0      | 3.989                        | 0        |
| _11425              | amiD2     | WalR        | 0      | 0      | 0      | 1.768                        | 0        |
| _11540              | ssaA1     | WalR        | RNAIII | 0      | 0      | 1.558                        | 0        |
| _11550              | isaA      | WalR        | 0      | 0      | 0      | 1.329                        | 0        |
| _13245              | lytM      | WalR        | 0      | 0      | 0      | 2.259                        | 0        |

**Table S4: Strains and plasmids used in this study.**

| <b>Strain</b>                                 | <b>Description/ Genotype</b>                                                                                                                                                                                                                  | <b>Source</b>       |
|-----------------------------------------------|-----------------------------------------------------------------------------------------------------------------------------------------------------------------------------------------------------------------------------------------------|---------------------|
| <b><i>Bacillus subtilis</i></b>               |                                                                                                                                                                                                                                               |                     |
| <i>B. subtilis</i> 168                        | <i>trpC2</i>                                                                                                                                                                                                                                  | 5, 6                |
| <i>B. subtilis</i> 168 $\Delta$ clpP (QB4916) | Derivative of <i>B. subtilis</i> 168; deletion of <i>clpP</i> ; spectinomycin resistant                                                                                                                                                       | 7                   |
| <b><i>Escherichia coli</i></b>                |                                                                                                                                                                                                                                               |                     |
| <i>E. coli</i> BL21 LOBSTR                    | Derived from <i>E. coli</i> BL21(DE3); modified copies of <i>arnA</i> and <i>slyD</i>                                                                                                                                                         | 8                   |
| <i>E. coli</i> K12 JM109                      | <i>recA1</i> , <i>endA1</i> , <i>gyrA96</i> , <i>thi</i> , <i>hsdR17</i> , <i>supE44</i> , <i>relA1</i> , $\lambda$ , $\Delta$ ( <i>lac-proAB</i> ), [F', <i>traD36</i> , <i>proAB</i> , <i>iacI<sup>q</sup>ZAM15</i> ]                       | 9                   |
| <b><i>Staphylococcus aureus</i></b>           |                                                                                                                                                                                                                                               |                     |
| HG003                                         | Derivative of NCTC 8325; <i>rsbU</i> <sup>+</sup> , <i>tcaR</i> <sup>+</sup>                                                                                                                                                                  | 10                  |
| NCTC8325-4                                    | Laboratory strain; derivative of NCTC 8325; <i>rsbU</i> <sup>-</sup> , <i>agr</i> <sup>-</sup> , UV-cured of $\Phi$ 11, $\Phi$ 12, $\Phi$ 13 prophages                                                                                        | 11                  |
| NCTC8325-4 $\Delta$ recU                      | Derivative of <i>S. aureus</i> NCTC8325-4; <i>recU</i> mutant lacking initial 165 codons of the gene                                                                                                                                          | 12                  |
| RN4220                                        | Laboratory strain; derivative of NCTC 8325-4; <i>rsbU</i> <sup>-</sup> , <i>agr</i> <sup>-</sup> , UV-cured of $\Phi$ 11, $\Phi$ 12, $\Phi$ 13 prophages; restriction-negative                                                                | 13                  |
| RN4220 GyrA <sup>S84L</sup>                   | Derivative of <i>S. aureus</i> RN4220; ciprofloxacin-resistant (GyrA Ser84Leu)                                                                                                                                                                | 14                  |
| RN4220 GyrB <sup>G86S</sup>                   | Derivative of <i>S. aureus</i> RN4220; novobiocin-resistant (GyrB Gly86Ser)                                                                                                                                                                   | 14                  |
| SG511 Berlin                                  | Antibiotic-susceptible strain (CP076660, locus tag prefix KQU62_)                                                                                                                                                                             | RKI Berlin, Germany |
| SA113                                         | Derivative of NCTC 8325; restriction- and modification-deficient                                                                                                                                                                              | 15                  |
| SA113 $\Delta$ tagO                           | Derivative of <i>S. aureus</i> SA113; erythromycin-resistant                                                                                                                                                                                  | 16                  |
| <b>Plasmid</b>                                | <b>Description</b>                                                                                                                                                                                                                            | <b>Source</b>       |
| pEPSA5                                        | Down-regulation of essential <i>S. aureus</i> genes; host <i>S. aureus</i> RN4220 by antisense RNA; clones containing inserts targeting <i>gyrA</i> , <i>gyrB</i> , <i>parC</i> , <i>parE</i> , <i>topA</i> , <i>topB</i> , and <i>divIVA</i> | 17                  |
| pET19-gyrA                                    | Plasmid for over-expression of full-length GyrA endonuclease from <i>S. aureus</i> SG511                                                                                                                                                      | this study          |
| pET21-gyrB                                    | Plasmid for over-expression of full-length GyrB endonuclease from <i>S. aureus</i> SG511                                                                                                                                                      | this study          |
| pREP4groESL(MT)                               | Plasmid encoding <i>E. coli</i> JM109 GroESL chaperones; facilitates folding and avoids formation of inclusion bodies during protein over-expression                                                                                          | 18                  |
| pTX15                                         | Xylose-inducible vector, containing <i>xyIA</i> and <i>xyIR</i> for expression control, TetR                                                                                                                                                  | 19                  |
| pTX15-vicRK                                   | Derivative of pTX15 with <i>walRK</i> under control of XylR                                                                                                                                                                                   | 20                  |

**Table S5: Oligonucleotide primers used in this study; n.d., not determined.**

| <b>Primer</b>        | <b>Sequence 5'-3'and restriction sites</b>                                | <b>T<sub>A</sub> [°C]</b> | <b>Reference</b> |
|----------------------|---------------------------------------------------------------------------|---------------------------|------------------|
| gyrA-for             | CTATACTCTAACTCGAGGCTGAATTACCTCAATC<br>(XhoI)                              | 56.8                      | 21               |
| gyrA-rev             | CATTACACATCCTCGAGTTATTATTCTTCATCTG<br>(XhoI)                              | 56.8                      | 21               |
| gyrB-for             | CGCGGATCCAATTTTGTTTAACTTTAAGAAGGAG<br>ATATAGCATGGTGACTIONGATTGTCA (BamHI) | 65.0                      | 21               |
| gyrB-rev             | TGCCTCGAGAGAACCCATGGTGAAGTCTAAGTTT<br>GCATAAACTGC (XhoI)                  | 65.0                      | 21               |
| R1-for<br>(V-448594) | TGAGGCAAACAAAACAACTCA                                                     | 62.0                      | 22               |
| R1-rev               | AGCCATCTTTCTTTGTGTTAACC                                                   | 62.0                      | This study       |
| R2-for<br>(V-92795f) | AATTGAATAACGGGAAGTAGCTCAG                                                 | 62.0                      | 22               |
| R2-rev               | GTTTCGTCAGATTCAAACGTTTTTC                                                 | 62.0                      | This study       |
| R3-for               | GAATAAATGGTGGAGAATGAC                                                     | 57.5                      | This study       |
| R3-rev               | CGCGTTATAATTAATCTTGTAAG                                                   | 57.5                      | This study       |
| R4-for<br>(V-98307r) | GCTTGCTTCTTTCTCCTCCTTC                                                    | 62.0                      | 22               |
| R4-rev               | ACCTCAGCCTTCCAAGCTGATG                                                    | 62.0                      | This study       |
| R5-for               | CGTGTTACCGCCGTGAAAGG                                                      | 58.4                      | This study       |
| R5-rev_2             | TTATTGTTATTGACTTCAATAATTAATGAAGTAC                                        | 58.4                      | This study       |
| V-450333             | AGGTAGCCGTATCGGAGGT                                                       | n.d.                      | 22               |
| V-451191             | GGAGGACCATCTCCTAAGGCTA                                                    | n.d.                      | 22               |
| V-452112f            | GGGTTAGTCGGGTCCTAAGC                                                      | n.d.                      | 22               |



## Publication bibliography

1. Schneider CA, Rasband WS, Eliceiri KW. 2012. NIH Image to ImageJ: 25 years of image analysis. *Nature Meth* 9:671–675. doi:10.1038/nmeth.2089.
2. Jones MB, Nierman WC, Shan Y, Frank BC, Spoering A, Ling L, Peoples A, Zullo A, Lewis K, Nelson KE. 2017. Reducing the bottleneck in discovery of novel antibiotics. *Microb Ecol* 73:658–667. doi:10.1007/s00248-016-0889-3.
3. Wickham H. 2016. *ggplot2. Elegant Graphics for Data Analysis*. Springer.
4. Fuchs S, Mehlan H, Bernhardt J, Hennig A, Michalik S, Surmann K, Pané-Farré J, Giese A, Weiss S, Backert L, Herbig A, Nieselt K, Hecker M, Völker U, Mäder U. 2018. AureoWiki -the repository of the *Staphylococcus aureus* research and annotation community. *Int J Med Microbiol* 308:558–568. doi:10.1016/j.ijmm.2017.11.011.
5. Burkholder PR, Giles NH. 1947. Induced biochemical mutations in *Bacillus subtilis*. *Am J Bot* 34:345. doi:10.2307/2437147.
6. Spizizen J. 1958. Transformation of biochemically deficient strains of *Bacillus subtilis* by deoxyribonucleate. *PNAS* 44:1072–1078. doi:10.1073/pnas.44.10.1072.
7. Msadek T, Dartois V, Kunst F, Herbaud ML, Denizot F, Rapoport G. 1998. ClpP of *Bacillus subtilis* is required for competence development, motility, degradative enzyme synthesis, growth at high temperature and sporulation. *Mol Microbiol* 27:899–914. doi:10.1046/j.1365-2958.1998.00735.x.
8. Andersen KR, Leksa NC, Schwartz TU. 2013. Optimized *E. coli* expression strain LOBSTR eliminates common contaminants from His-tag purification. *Proteins* 81:1857–1861. doi:10.1002/prot.24364.
9. Yanisch-Perron C, Vieira J, Messing J. 1985. Improved M13 phage cloning vectors and host strains: nucleotide sequences of the M13mp18 and pUC19 vectors. *Gene* 33:103–119. doi:10.1016/0378-1119(85)90120-9.
10. Herbert S, Ziebandt A-K, Ohlsen K, Schäfer T, Hecker M, Albrecht D, Novick R, Götz F. 2010. Repair of global regulators in *Staphylococcus aureus* 8325 and comparative analysis with other clinical isolates. *Inf Immun* 78:2877–2889. doi:10.1128/IAI.00088-10.
11. Novick R. 1967. Properties of a cryptic high-frequency transducing phage in *Staphylococcus aureus*. *Virology* 33:155–166. doi:10.1016/0042-6822(67)90105-5.
12. Pereira AR, Reed P, Veiga H, Pinho MG. 2013. The Holliday junction resolvase RecU is required for chromosome segregation and DNA damage repair in *Staphylococcus aureus*. *BMC Microbiol* 13:18. doi:10.1186/1471-2180-13-18.
13. Kreiswirth BN, Löfdahl S, Betley MJ, O'Reilly M, Schlievert PM, Bergdoll MS, Novick RP. 1983. The toxic shock syndrome exotoxin structural gene is not detectably transmitted by a prophage. *Nature* 305:709–712. doi:10.1038/305709a0.
14. Chiriac AI, Kloss F, Krämer J, Vuong C, Hertweck C, Sahl H-G. 2015. Mode of action of closthioamide. *J Antimicrob Chemother* 70:2576–2588. doi:10.1093/jac/dkv161.
15. Iordanescu S, Surdeanu M. 1976. Two restriction and modification systems in *Staphylococcus aureus* NCTC8325. *J Gen Microbiol* 96:277–281. doi:10.1099/00221287-96-2-277.
16. Weidenmaier C, Kokai-Kun JF, Kristian SA, Chanturiya T, Kalbacher H, Gross M, Nicholson G, Neumeister B, Mond JJ, Peschel A. 2004. Role of teichoic acids in *Staphylococcus aureus* nasal colonization, a major risk factor in nosocomial infections. *Nat Med* 10:243–245. doi:10.1038/nm991.
17. Forsyth RA, Haselbeck RJ, Ohlsen KL, Yamamoto RT, Xu H, Trawick JD, Wall D, Wang L, Brown-Driver V, Froelich JM, C KG, King P, McCarthy M, Malone C, Misiner B, Robbins D, Tan Z, Zhu Zy

- Z, Carr G, Mosca DA, Zamudio C, Foulkes JG, Zyskind JW. 2002. A genome-wide strategy for the identification of essential genes in *Staphylococcus aureus*. *Mol Microbiol* 43:1387–1400. doi:10.1046/j.1365-2958.2002.02832.x.
18. Türck M, Bierbaum G. 2012. Purification and activity testing of the full-length YycFGHI proteins of *Staphylococcus aureus*. *PLoS One* 7:e30403. doi:10.1371/journal.pone.0030403.
  19. Peschel A, Ottenwälder B, Götz F. 1996. Inducible production and cellular location of the epidermin biosynthetic enzyme EpiB using an improved staphylococcal expression system. *FEMS Microbiol Lett* 137:279–284. doi:10.1111/j.1574-6968.1996.tb08119.x.
  20. Jansen A, Türck M, Szekat C, Nagel M, Clever I, Bierbaum G. 2007. Role of insertion elements and *yycFG* in the development of decreased susceptibility to vancomycin in *Staphylococcus aureus*. *Int J Med Microbiol* 297:205–215. doi:10.1016/j.ijmm.2007.02.002.
  21. Saiki AY, Shen LL, Chen CM, Baranowski J, Lerner CG. 1999. DNA cleavage activities of *Staphylococcus aureus* gyrase and topoisomerase IV stimulated by quinolones and 2-pyridones. *Antimicrob Agents Chemother* 43:1574–1577. doi:10.1128/AAC.43.7.1574.
  22. Berscheid A. 2014. Characterization of *Staphylococcus aureus* VC40 reveals a major role of the VraS and Walk histidine kinases in the development of vancomycin and daptomycin resistance. PhD thesis, Rheinische Friedrich-Wilhelms-Universität, Bonn, Germany.
